# Supplementary material for: NMR-based plasma metabolomics of adult B-cell acute lymphoblastic leukemia
Source: Royal Society of Chemistry journal article supplement (doi:10.1039/d0mo00067a), 2020-11-12
Supplement: d0mo00067a1.pdf [file d0mo00067a1.pdf]

# **Non-targeted plasma metabolomics of Adult B-cell Acute Lymphoblastic Leukemia**

**Fengmin Yang<sup>a,b</sup>, Qian Li<sup>a</sup>, Junfeng Xiang<sup>a</sup>, Hong Zhang<sup>a</sup>, Hongxia Sun<sup>a\*</sup>, Guorui Ruan<sup>c\*</sup>,  
Yalin Tang<sup>a,b\*</sup>**

**1** National Laboratory for Molecular Sciences, Center for Molecular Sciences, State Key Laboratory for Structural Chemistry of Unstable and Stable Species, Institute of Chemistry, Chinese Academy of Sciences, Beijing, P. R. China, **2** University of the Chinese Academy of Sciences, Beijing, P. R. China, **3** Peking University People's Hospital and Institute of Hematology, Beijing, P. R. China.

\* [hongxsun@iccas.ac.cn](mailto:hongxsun@iccas.ac.cn) (HS); [tangyl@iccas.ac.cn](mailto:tangyl@iccas.ac.cn) (YT); [ruanguorui@pkuph.edu.cn](mailto:ruanguorui@pkuph.edu.cn)

(RG)

Table S1 Plasma samples used in study

| Sample group | Sample size | Gender                  | Age         | Stratification                                |
|--------------|-------------|-------------------------|-------------|-----------------------------------------------|
| Control      | 19          | Male = 10<br>Female = 9 | 18-58(39.8) | -                                             |
| ALL          | 19          | Male = 10<br>Female = 9 | 23-58(40.1) | Com-B-ALL(13)<br>Pro-B-ALL(5)<br>Pre-B-ALL(1) |

Table S2 Assignments of plasma metabolites

| Key | Metabolites                                      | Moieties                                                                                                  | $\delta^1\text{H}$ (ppm) and multiplicity*                                 |
|-----|--------------------------------------------------|-----------------------------------------------------------------------------------------------------------|----------------------------------------------------------------------------|
| 1   | Lipids(mainly LDL)                               | $\text{CH}_3, (\text{CH}_2)_n$                                                                            | 0.85(t),1.25(m)                                                            |
| 2   | Lipids(mainly VLDL)                              | $\text{CH}_3, (\text{CH}_2)_n$                                                                            | 0.88(t), 1.29(m)                                                           |
| 3   | Isoleucine                                       | $\delta\text{CH}_3, \beta\text{CH}_3,$<br>half- $\gamma\text{CH}_2,$<br>$\beta\text{CH}, \alpha\text{CH}$ | 0.94(t),1.01(d)                                                            |
| 4   | Leucine                                          | $\delta\text{CH}_3, \beta\text{CH}_3$                                                                     | 0.92(d), 0.95(d),                                                          |
| 5   | Valine                                           | $\gamma\text{-CH}_3, \alpha\text{CH}, \beta\text{CH}$                                                     | 0.99(d), 1.05(d)                                                           |
| 6   | Lactate                                          | $\beta\text{CH}_3, \alpha\text{CH}$                                                                       | 1.33(d), 4.11(q)                                                           |
| 7   | Alanine                                          | $\text{CH}_3, \alpha\text{CH}$                                                                            | 1.49(d),3.78(q)                                                            |
| 8   | Citrulline                                       | $\gamma\text{CH}_2, \beta\text{CH}_2$                                                                     | 1.58(m)                                                                    |
| 9   | Arginine                                         | $\beta\text{CH}_2, \gamma\text{CH}_2$                                                                     | 1.89(m),1.73(dd)                                                           |
| 10  | Acetate                                          | $\text{CH}_3$                                                                                             | 1.91(s)                                                                    |
| 11  | Proline                                          | $\gamma\text{CH}_2$                                                                                       | 1.99(m)                                                                    |
| 12  | N-acetyl-glycoproteins                           | $\text{CH}_3$                                                                                             | 2.04(s)                                                                    |
| 13  | Glutamate                                        | half- $\beta\text{CH}_2, \gamma\text{CH}_2$                                                               | 2.08(m), 2.34(m)                                                           |
| 14  | Glutamine                                        | $\beta\text{CH}_2, \gamma\text{CH}_2$                                                                     | 2.13(m), 2.45(m)                                                           |
| 15  | Pyruvate                                         | $\text{CH}_3$                                                                                             | 2.41(s)                                                                    |
| 16  | Citrate                                          | half- $\text{CH}_2,$ half- $\text{CH}_2$                                                                  | 2.55(d),2.65(d)                                                            |
| 17  | Unsaturated lipid                                | $\text{CH}=\text{CH}$                                                                                     | 2.75(m),5.31(m)                                                            |
| 18  | $\alpha$ -Ketoglutarate                          | $\text{CH}_2, \text{CH}_2$                                                                                | 2.45(t),3.02(t)                                                            |
| 19  | Creatine                                         | $\text{N-CH}_3, \text{CH}_2$                                                                              | 3.04(s), 3.93(s)                                                           |
| 20  | Creatinine                                       | $\text{N-CH}_3, \text{CH}_2$                                                                              | 3.05(s),4.05(s)                                                            |
| 21  | Choline                                          | $\text{N-(CH}_3)_3, \text{N-CH}_2,$<br>$\text{CH}_2\text{OH}$                                             | 3.2(s),3.66(m),<br>4.30(m)                                                 |
| 22  | Phosphorylcholine(PC)/Glycerophosphocholine(GPC) | $\text{N-(CH}_3)_3, \text{NCH}_2,$<br>$\text{CH}_2\text{OH}$                                              | 3.22(s),<br>3.61(t),3.68(t)<br>4.63 (m)                                    |
| 23  | Glucose                                          | $\beta(\text{H}_2, \text{H}_3, \text{H}_5), \alpha(\text{H}_2,$<br>$\text{H}_3, \text{H}_6)$              | 3.90(dd) ), $\alpha(3.54(\text{dd}), 3.71(\text{t}),$<br>3.72(dd),3.83(m)) |
| 24  | Trimethylamine-N-oxide                           | $\text{N-(CH}_3)_3$                                                                                       | 3.26(s)                                                                    |
| 25  | Glycine                                          | $\text{CH}_2$                                                                                             | 3.56(s)                                                                    |
| 26  | Glycerol                                         | half- $\text{CH}_2, \text{C}_2\text{-H}$                                                                  | 3.58(dd), 3.66(dd)                                                         |
| 27  | Serine                                           |                                                                                                           | 3.83(dd),<br>3.92-4.00(m)                                                  |
| 28  | Cholesterol                                      | $\text{C}_{18}(\text{in VLDL})$                                                                           | 0.70(m)                                                                    |
| 29  | $\beta$ -glucose                                 | 1-CH                                                                                                      | 4.66(d)                                                                    |
| 30  | Glycerol of lipids                               | CHOCOR                                                                                                    | 5.20(m)                                                                    |
| 31  | $\alpha$ -glucose                                | 1-CH                                                                                                      | 5.23(d)                                                                    |

|    |                             |                                                                                         |                                                                                            |
|----|-----------------------------|-----------------------------------------------------------------------------------------|--------------------------------------------------------------------------------------------|
| 32 | Urea                        | $\text{NH}_2+\text{NH}_2$                                                               | 5.63                                                                                       |
| 33 | Tyrosine                    | CH,CH                                                                                   | 6.90(dd), 7.20(dd)                                                                         |
| 34 | Histidine                   | H4,H2                                                                                   | 7.05(s),7.77(s)                                                                            |
| 35 | Formate                     | CH                                                                                      | 8.46(s)                                                                                    |
| 36 | Cholesterol                 | CH <sub>3</sub> ( C18(in HDL),<br>C18(in<br>VLDL),C21 ),CH <sub>2</sub> C<br>OOR        | 0.66(m), 0.70(m),<br>0.91(m), 2.34(m)                                                      |
| 37 | Lipids (CH <sub>2</sub> )   | CH <sub>3</sub> (CH <sub>2</sub> ) <sub>n</sub> ,CH <sub>2</sub> CH <sub>2</sub><br>CO, | 0.94(m), 1.58(m)                                                                           |
| 38 | Lipids (CH <sub>2</sub> CO) | CH <sub>2</sub> CO                                                                      | 2.25(m)                                                                                    |
| 39 | O-acetyl glycoproteins      | CH <sub>3</sub>                                                                         | 2.06(s)                                                                                    |
| 40 | Polyunsaturated fatty acid  | C=C-CH <sub>2</sub> -C=C                                                                | 2.78(m)                                                                                    |
| 41 | Triglyceride                | CH <sub>2</sub> OCOR                                                                    | 2.43(m), 3.53(m),<br>4.06(m), 4.28(m),<br>5.2(m)<br>5.23(m), 5.26(m),<br>5.27(m), 5.29(m), |

---

s: single; d: doublet; t: triplet; q: quartet; m: multiplet; dd: doublet of doublet

Table S3 Differential metabolites between healthy controls and ALL patients in BPP-LED spectra.

m: multiplet

| Metabolites                       | $\delta^1\text{H}(\text{ppm})$ | Multiplicity | P-value | Changes in the ALL patients against the healthy controls |
|-----------------------------------|--------------------------------|--------------|---------|----------------------------------------------------------|
| LDL                               | 1.25                           | m            | 0.0001  | ↑                                                        |
| Lipids ( $\text{CH}_2$ )          | 1.58                           | m            | 0.0004  | ↑                                                        |
| Lipids ( $\text{CH}_2\text{CO}$ ) | 2.25                           | m            | 0.0011  | ↑                                                        |
| PC/GPC                            | 3.68                           | m            | 0.0005  | ↓                                                        |
| Unsaturated lipid                 | 5.31                           | m            | 0.0007  | ↑                                                        |

Table S4 The related parameters of logistic regression equation

| Regression model                          | metabolites       | Regression coefficients | p     |
|-------------------------------------------|-------------------|-------------------------|-------|
| The healthy controls vs. the ALL patients | Choline           | -34.631                 | 0.024 |
|                                           | Tyrosine          | 333.037                 | 0.029 |
|                                           | Unsaturated lipid | 49.748                  | 0.046 |
|                                           | Constant          | -27.649                 | 0.087 |

Table S5 The evaluation of diagnostic efficacy of Logistic regression model

| Positive                                     | Negative                                      | Specificity(true<br>negative/negative) | Sensitivity(true<br>positive/<br>positive) | The accuracy of<br>the logistic<br>regression model |
|----------------------------------------------|-----------------------------------------------|----------------------------------------|--------------------------------------------|-----------------------------------------------------|
| 17(true<br>positive)<br>1(false<br>positive) | 2(false<br>negative)<br>18(true<br>negative ) | 94.7%                                  | 89.5%                                      | 92.1%                                               |

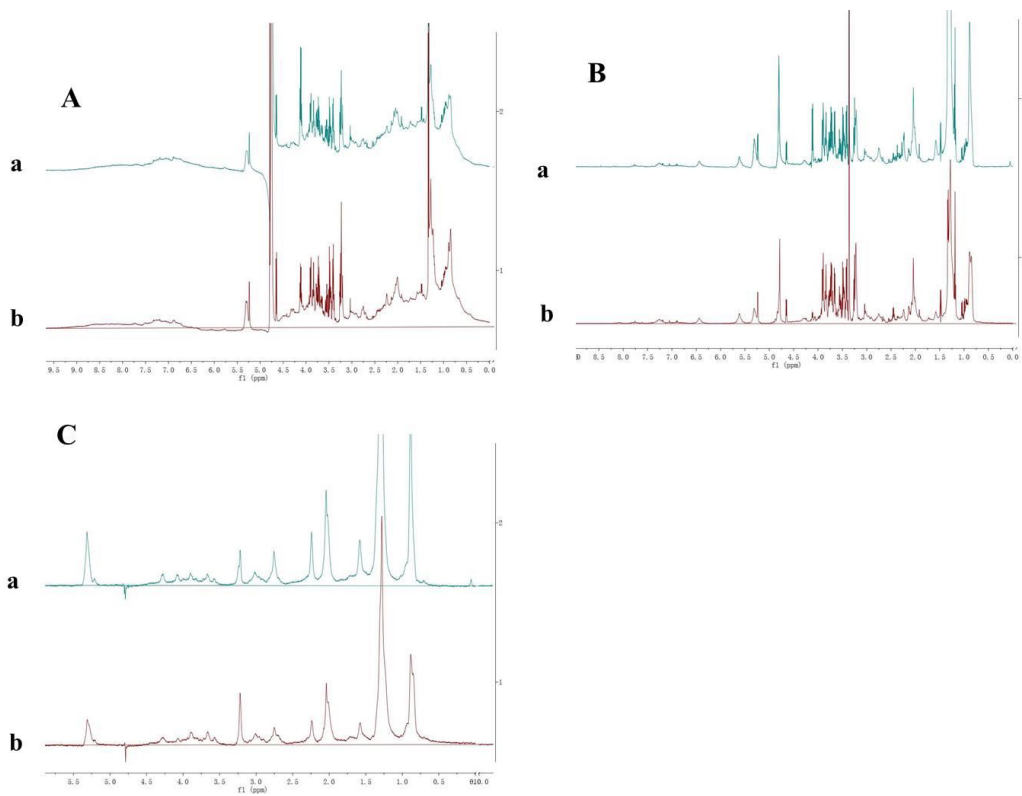

Figure S1  $^1\text{H}$  NMR spectra of plasma from healthy control (a) and ALL (b) (A) NOESY, (B) CPMG, (C) BPP-LED.



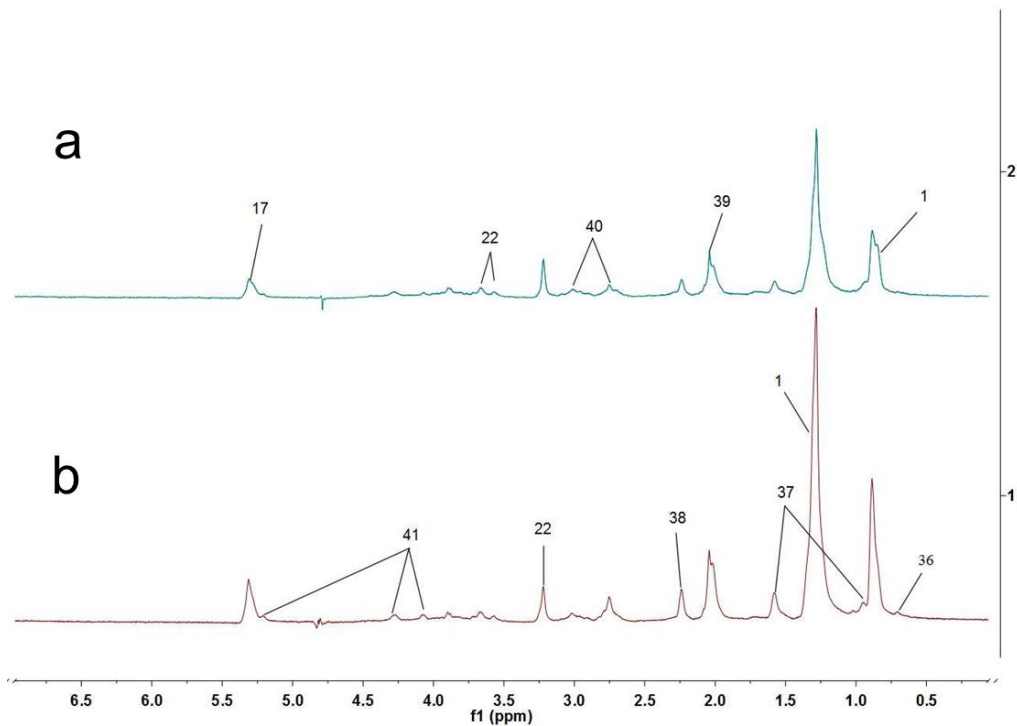

Figure S2 Typical BPP-LED  $^1\text{H}$  NMR spectra of plasma for healthy control (a) and ALL patient (b). 1. Lipids (mainly LDL); 17. Unsaturated lipid; 22. PC/ GPC; 36. Cholesterol; 37. Lipids (CH<sub>2</sub>); 38. Lipids (CH<sub>2</sub>CO); 39. O-acetyl glycoproteins; 40. Polyunsaturated fatty acid; 41. Triglyceride.

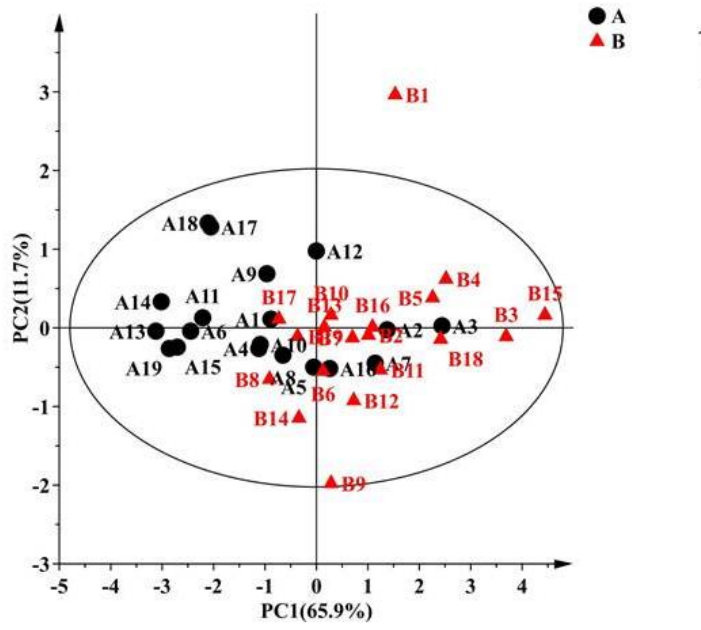

Figure S3 The scores of the PCA for the controls (green circle ) and the ALL patients ( blue box ) in CPMG

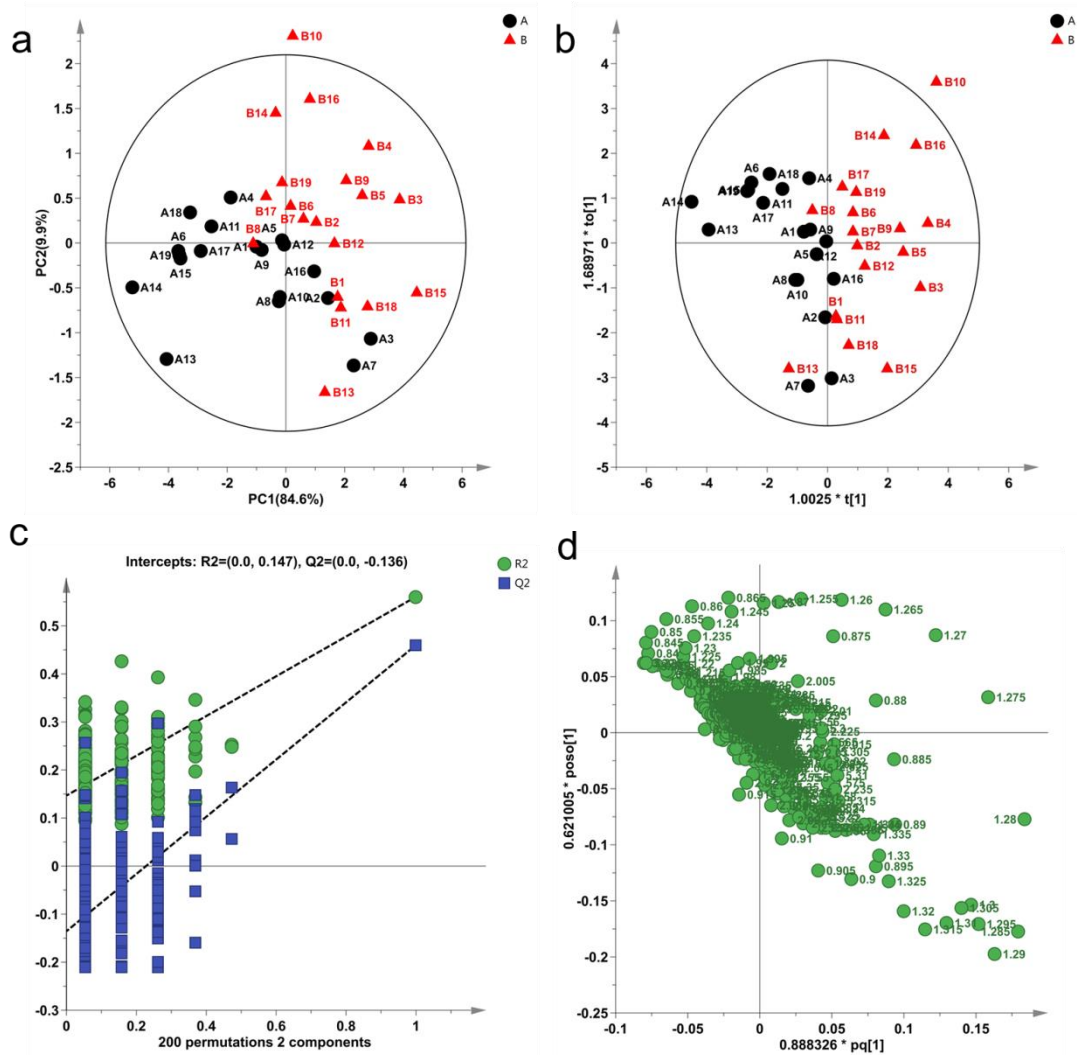

Figure S4 Multivariate analyses of BPP-LED  $^1\text{H}$  NMR spectra of healthy controls and ALL patients. (a) The scores of the PCA for healthy controls (A, black circle) and ALL patients (B, red triangle), (b) The scores of the OPLS-DA for healthy controls (A, black circle) and ALL patients (B, red triangle), (c) The permutation test result for the OPLS-DA model ( $R^2 = (0.0, 0.147)$ ,  $Q^2 = (0.0, -0.136)$ ). (d) The corresponding loading plot of the OPLS-DA model.
